# Supplementary material
Source: ML conference proceedings conference paper supplement (https://openreview.net/forum?id=Pwz8xOM9jz)
Supplement: supplementary_material [file more_exps.pdf › ICLR-more/more_exps.pdf]

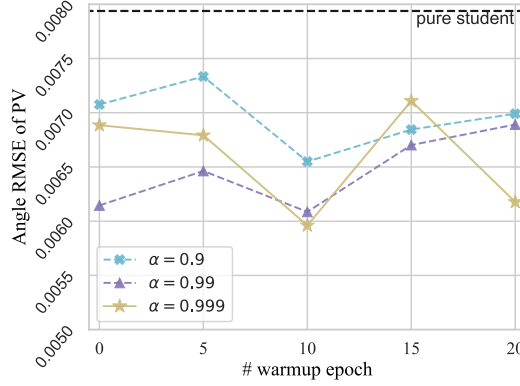

Figure 5: We examine the impact of the EMA warm-up epoch on the IEEE 39-Bus system. By default, we use a smoothing factor of  $\alpha = 0.99$  and apply a 10-epoch warm-up period.

Table 4: Effects of the weight  $\lambda$  on the equation loss  $\mathcal{L}_{equ}$ . We set  $\lambda$  as 0.1 by default.

| $\lambda$        | 0.0        | 0.05       | 0.10              | 0.15       | 0.20              | 0.25       |
|------------------|------------|------------|-------------------|------------|-------------------|------------|
| PQ <sub>Vm</sub> | 0.00099400 | 0.00083139 | 0.00078161        | 0.00118891 | <b>0.00075882</b> | 0.00111757 |
| PQ <sub>Va</sub> | 0.01137573 | 0.00768562 | 0.00608600        | 0.00752592 | <b>0.00590381</b> | 0.00866294 |
| PV <sub>Va</sub> | 0.01234842 | 0.00835177 | <b>0.00609802</b> | 0.00805090 | 0.00646078        | 0.00960786 |

## A MORE EXPERIMENTS.

Table 5: Power flow estimation on IEEE 1354pegase.

|                              | PQ <sub>Vm</sub>  | PQ <sub>Va</sub>  | PV <sub>Va</sub>  |
|------------------------------|-------------------|-------------------|-------------------|
| PowerflowNet [21] with 2k-ep | 0.00082930        | 0.02937557        | 0.02814063        |
| Senseflow with 100-ep        | 0.00196035        | 0.03509841        | 0.03051907        |
| Senseflow with 500-ep        | <b>0.00013276</b> | <b>0.00077648</b> | <b>0.00071715</b> |

Table 4 shows that without incorporating the equation loss (i.e.,  $\lambda = 0$ ), the RMSE for phase angle predictions of PV and PQ nodes is at its worst, around 0.01. Based on our findings, we select a default value of 0.1 for  $\lambda$ , as it yields improved accuracy for both types of phase angle predictions and maintains a reasonable balance between equation loss and ground-truth loss, which differ by approximately 10-fold.

Figure 5 illustrates the effect of the self-ensembling mechanism on phase angle predictions. Without self-ensembling, the RMSE is approximately 0.008 while incorporating Selter reduces the RMSE to around 0.006. We set the momentum parameter to be 0.99 due to its stable performance across different warm-up epochs, and its corresponding best warm-up period of 10 epochs as the default.

We also establish a new benchmark of IEEE 1354-Bus, containing 40W training samples and 10W test samples, with 50% parameter perturbation and distinct topology for testing. We adopt the exact same model as we used for IEEE 300-Bus, but differently we train the model for 500 epochs. As shown in Table 5, our senseflow can obtain high-accuracy power flow estimations.
